# Supplementary material
Source: PubMed Central journal article supplement (PMC2660957)
Supplement: rspb20081546s22.pdf [file rspb20081546s22.pdf]

## Electronic supplementary material

Appendix A: Repeated  $n$ -player Prisoner's Dilemma for the smallest possible population size  $N$  ( $N = n$ ) for general strategy

Each game involves all the  $N$  individuals in the population and consists of one or more rounds. We consider two strategies: ALLD and R. ALLD always defect no matter what other individuals do. R can be any strategy that cooperates at least once during each game when there are only one R and  $N - 1$  ALLDs in the population. The payoffs,  $V(C|l)$  and  $V(D|l)$ , have the same properties as above, given by (S1)-(S4).

First, let us consider whether strategy R is  $ESS_N$  or not. From (S1) and (S3), we have  $V(D|l) > V(C|l)$ . This inequality means that a single mutant ALLD in a population of strategy R does not have a lower fitness and thus the first condition for R to be  $ESS_N$  is violated. Therefore, we conclude strategy R that is  $ESS_N$  does not exist.

Second, we examine whether ALLD is  $ESS_N$  or not. Since  $V(D|1) > V(C|1)$  and a mutant R cooperates at least once, selection opposes R invading ALLD, that is, the first condition for ALLD to be  $ESS_N$  is satisfied. The fixation probability of R is given by

$$\rho_R = 1 / \left( 1 + \sum_{k=1}^{N-1} \prod_{i=1}^k \frac{1 - w + wG_i}{1 - w + wF_i} \right),$$

where  $i$  denotes the number of R individuals and  $F_i$  and  $G_i$  are the expected payoffs of R and ALLD, respectively (see main text). Since  $F_1 < G_1$  and  $F_i \leq G_i$  ( $2 \leq i \leq N - 1$ ) from the definition of R, the second condition for ALLD to be  $ESS_N$  is satisfied. Therefore, we can conclude that ALLD is  $ESS_N$ .

To sum up, even in repeated  $n$ -player Prisoner's Dilemma, cooperation cannot evolve when population size and group size are the same. Note that the argument in this

subsection applies for any payoff functions that satisfy (S1)-(S4): we do not have to assume specific payoff functions such  $V(C|k) = bk/n - c$  and  $V(D|k) = bk/n$ . Also, the argument does not presuppose weak selection.

#### Appendix B: One-shot $n$ -player Prisoner's Dilemma for general population size

Groups of  $n$  individuals are sampled from the population of size  $N$  and a game is played within each group. A game consists of only one round, in each of which individuals either cooperate or defect. When some individuals cooperate, all the individuals in the group gain a benefit from it while only the cooperating individuals have to pay a cost.

Let  $V(C|l)$  and  $V(D|l)$  be the payoffs to individuals choosing cooperation and defection given that  $l$  of  $n$  individuals in the group choose cooperation. The  $n$ -player Prisoner's Dilemma demands that these payoffs have the following properties:

$$V(D|l) > V(C|l + 1), \quad (\text{S1})$$

$$V(D|l + 1) > V(D|l), \quad (\text{S2})$$

$$V(C|l + 1) > V(C|l), \quad (\text{S3})$$

$$(l + 1)V(C|l + 1) + (n - l - 1)V(D|l + 1) > lV(C|l) + (n - l)V(D|l), \quad (\text{S4})$$

where  $0 \leq l \leq n - 1$ . Using (S1) and (S3), we can conclude that D is always traditional ESS while C never is. Now, let us examine for general  $N$  whether either or both C and D can be  $\text{ESS}_N$ . First, consider the case when a mutant D appears in a population of C. Using (S1) and (S3), we can obtain an inequality, that is,

$$(N - 1)V(D|l) > (N - n)V(C|l + 1) + (n - 1)V(C|l).$$

This inequality implies that the first condition for C to be  $\text{ESS}_N$  is violated (let  $a_k = V(D|k - 1)$ ,  $b_k = V(C|k)$  and  $l = n - 1$  in (5) in the main text), that is, a single mutant D in a population of C has a higher fitness. Therefore, we conclude that C cannot be  $\text{ESS}_N$ .

Second, suppose that a mutant C has appeared in a population of D. From (S1) and (S2), we obtain

$$(N-1)V(C|l+1) < (N-n)V(D|l) + (n-1)V(D|l+1),$$

which suggests that the first condition for D to be  $ESS_N$  is satisfied (let  $a_k = V(C|n-k+1)$ ,  $b_k = V(D|n-k)$  and  $l = 0$  in (5) in the main text). The fixation probability of C is given by

$$\rho_C = 1 / \left( 1 + \sum_{k=1}^{N-1} \prod_{i=1}^k \frac{1-w+wG_i}{1-w+wF_i} \right),$$

where  $i$  denotes the number of C individuals and  $F_i$  and  $G_i$  are the expected payoffs of C and D, respectively (see main text). From (S1) and (S2), we have

$$\sum_{k=1}^n \frac{\binom{i-1}{n-k} \binom{N-i}{k-1}}{\binom{N-1}{n-1}} V(C|n-k+1) < \sum_{k=1}^n \frac{\binom{i}{n-k} \binom{N-i-1}{k-1}}{\binom{N-1}{n-1}} V(D|n-k),$$

that is,  $F_i < G_i$  ( $1 \leq i \leq N-1$ ). Hence,  $\rho_C < 1/N$  and thus the second condition for D to be  $ESS_N$  is satisfied. Therefore, we can conclude that D is  $ESS_N$ .

To sum up, in nonrepeated  $n$ -player Prisoner's Dilemma, C is neither  $ESS_N$  nor traditional ESS, and D is not only ESS but also  $ESS_N$ . Hence, cooperation cannot emerge in populations consisting of defectors. Note that the argument in this subsection applies for any payoff functions that satisfy (S1)-(S4) and for any selection intensity.

Appendix C: For  $n=2, 3$ , no payoff matrix exists for which both A and B are traditional ESS but neither is  $ESS_N$ .

In two-player games,

$$2a_1 + a_2 < 2b_1 + b_2$$

$$a_1 + 2a_2 > b_1 + 2b_2$$

$$a_1 > b_1$$

$$a_2 < b_2$$

All these inequalities cannot be satisfied simultaneously. Hence, for  $n=2$ , no payoff matrix exists for which both A and B are traditional ESS but neither is  $ESS_N$ .

Similarly, in three player games,

$$3a_1+2a_2+a_3 < 3b_1+2b_2+b_3$$

$$a_1+2a_2+3a_3 > b_1+2b_2+3b_3$$

$$a_1 > b_1$$

$$a_3 < b_3$$

All these inequalities cannot be met simultaneously. Hence, for  $n=3$ , no payoff matrix exists for which both A and B are traditional ESS but neither is  $ESS_N$ .

Appendix D: Figure illustrates the relationship between payoff parameter ( $b/c$ ), group size ( $n$ ) and the minimum number of rounds ( $m$ ) required for  $\rho_{ALLD} < 1/N$ ,  $\rho_{TFT_{n-1}} > \rho_{ALLD}$  or  $\rho_{TFT_{n-1}} > 1/N$  when  $N$  is large. The blue represents the number of rounds for which  $\rho_{ALLD} = 1/N$ , while the green represents that for which  $\rho_{TFT_{n-1}} = \rho_{ALLD}$  and the red represents that for which  $\rho_{TFT_{n-1}} = 1/N$ . The parameter space is divided into the following four regions: (i)  $TFT_{n-1}$  is  $ESS_N$  and  $ALLD$  is not  $ESS_N$ ; (ii) both  $TFT_{n-1}$  and  $ALLD$  are  $ESS_N$  and  $\rho_{TFT_{n-1}} > \rho_{ALLD}$ ; (iii) both  $TFT_{n-1}$  and  $ALLD$  are  $ESS_N$  and  $\rho_{TFT_{n-1}} < \rho_{ALLD}$ ; and (iv)  $TFT_{n-1}$  is not  $ESS_N$  and  $ALLD$  is  $ESS_N$ . This figure reduces to figure 1a when  $b/c = 1.5$  and to figure 1b when  $b/(nc) = 0.51$ .

the number of rounds( $m$ )

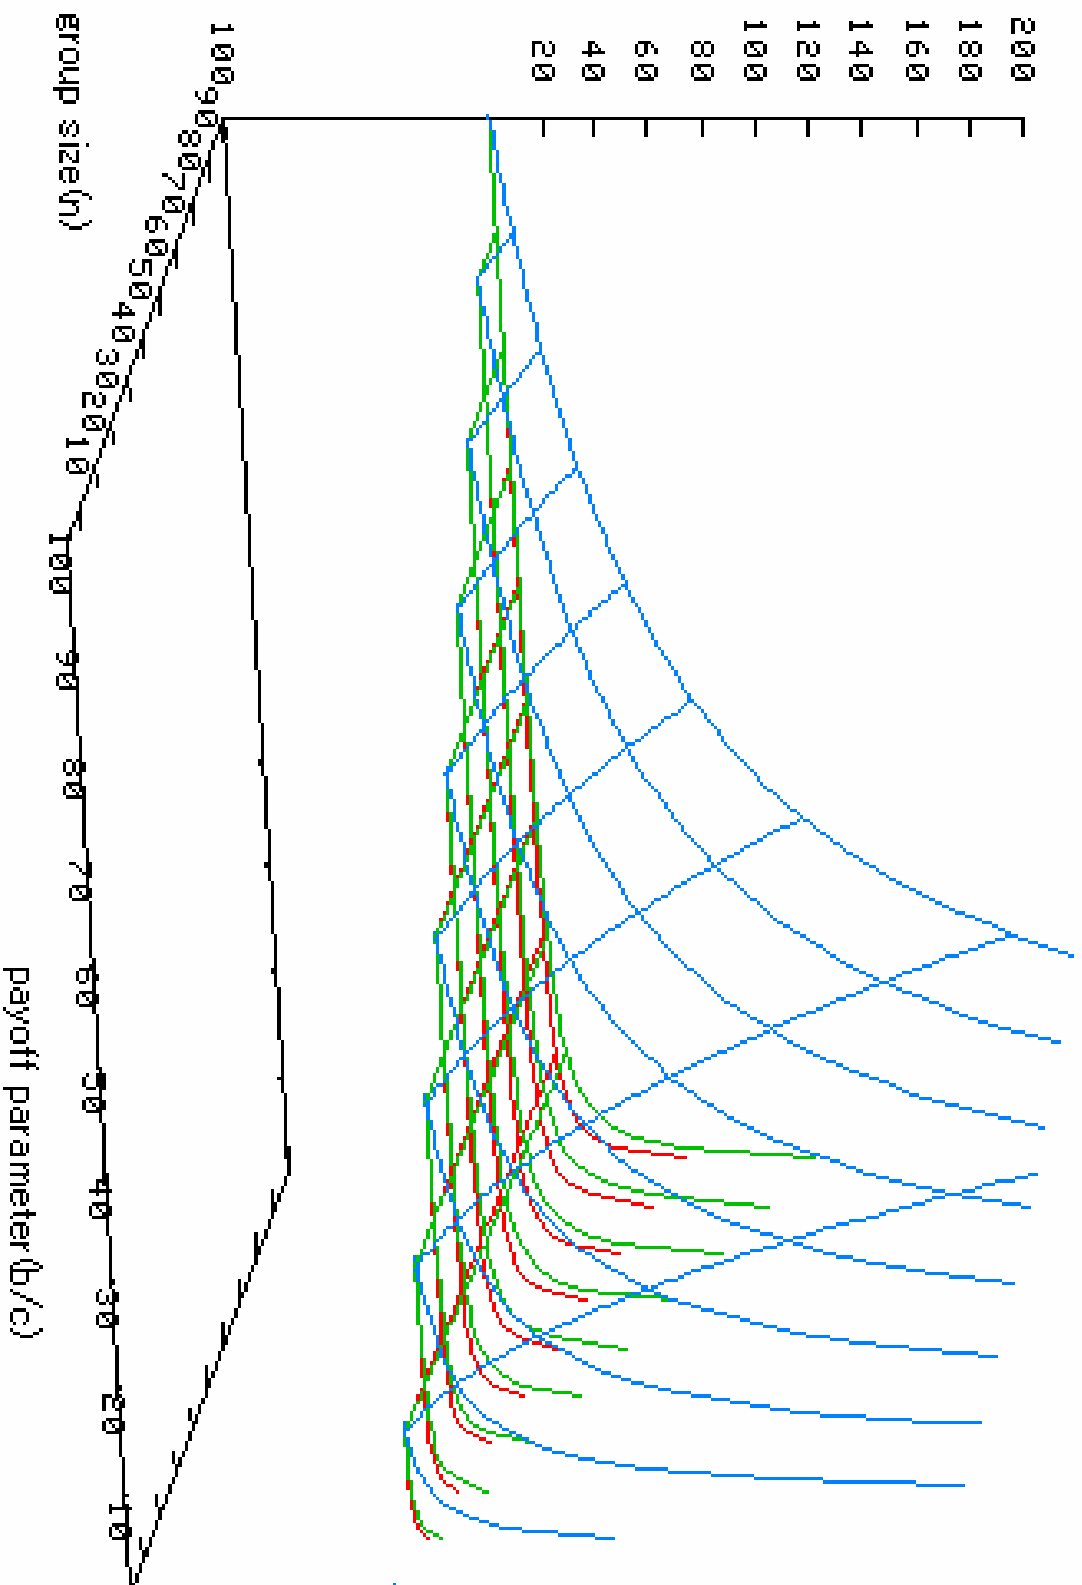

Figure
